# Supplementary material for: Morphology-controlled synthesis of novel nanostructured Li4P2O7 with enhanced Li-ion conductivity for all-solid-state battery applications
Source: Royal Society of Chemistry journal article supplement (doi:10.1039/d3dt04377k), 2024-01-01
Supplement: d3dt04377k1.pdf [file d3dt04377k1.pdf]

## Morphology-controlled synthesis of novel nanostructured Li<sub>4</sub>P<sub>2</sub>O<sub>7</sub> with enhanced Li-ion conductivity for all-solid-state battery applications

Hany El-Shinawi,<sup>a,b\*</sup> Edmund J. Cussen<sup>a</sup> and Serena A. Cussen<sup>a</sup>

<sup>a</sup> Department of Materials Science and Engineering, University of Sheffield, Sir Robert Hadfield Building, Sheffield, S1 3JD, UK.

<sup>b</sup> Department of Chemistry, Mansoura University, Mansoura, 35516, Egypt.

### Supporting Information:

**Table S1.** Refined structural parameters from Rietveld fit against XRD data for Li<sub>4</sub>P<sub>2</sub>O<sub>7</sub>-400 at room temperature.

| atom | site | occupation | x         | y        | z        | U <sub>iso</sub> (Å <sup>2</sup> ) |
|------|------|------------|-----------|----------|----------|------------------------------------|
| P1   | 4e   | 1          | 0.133(2)  | 0.714(2) | 0.377(1) | 0.127(4)                           |
| P2   | 4e   | 1          | 0.894(2)  | 0.758(2) | 0.133(1) | 0.127(4)                           |
| O1   | 4e   | 1          | 0.017(3)  | 0.784(4) | 0.101(3) | 0.166(5)                           |
| O2   | 4e   | 1          | 0.876(3)  | 0.136(4) | 0.124(2) | 0.166(5)                           |
| O3   | 4e   | 1          | 0.695(3)  | 0.792(5) | 0.160(3) | 0.166(5)                           |
| O4   | 4e   | 1          | 0.770(3)  | 0.734(4) | 0.039(2) | 0.166(5)                           |
| O5   | 4e   | 1          | 0.511(4)  | 0.196(4) | 0.099(3) | 0.166(5)                           |
| O6   | 4e   | 1          | 0.411(3)  | 0.617(4) | 0.114(2) | 0.166(5)                           |
| O7   | 4e   | 1          | 0.262(3)  | 0.227(5) | 0.163(3) | 0.166(5)                           |
| Li1  | 4e   | 1          | 0.729(3)  | 0.220(4) | 0.185(2) | 0.088(2)                           |
| Li2  | 4e   | 1          | -0.020(3) | 0.380(4) | 0.081(2) | 0.088(2)                           |
| Li3  | 4e   | 1          | 0.256(3)  | 0.313(4) | 0.329(2) | 0.088(2)                           |
| Li4  | 4e   | 1          | 0.374(3)  | 0.906(4) | 0.122(2) | 0.088(2)                           |

<sup>a</sup>Space group  $P2_1/n$ ,  $a=8.6181(6)$  Å,  $b=5.1863(2)$  Å,  $c=13.1373(1)$  Å, and  $\beta=103.624(5)$ ; fit statistics:  $\chi^2=2.243$ ;  $wRp=0.0837$ ,  $Rp=0.0612$ .

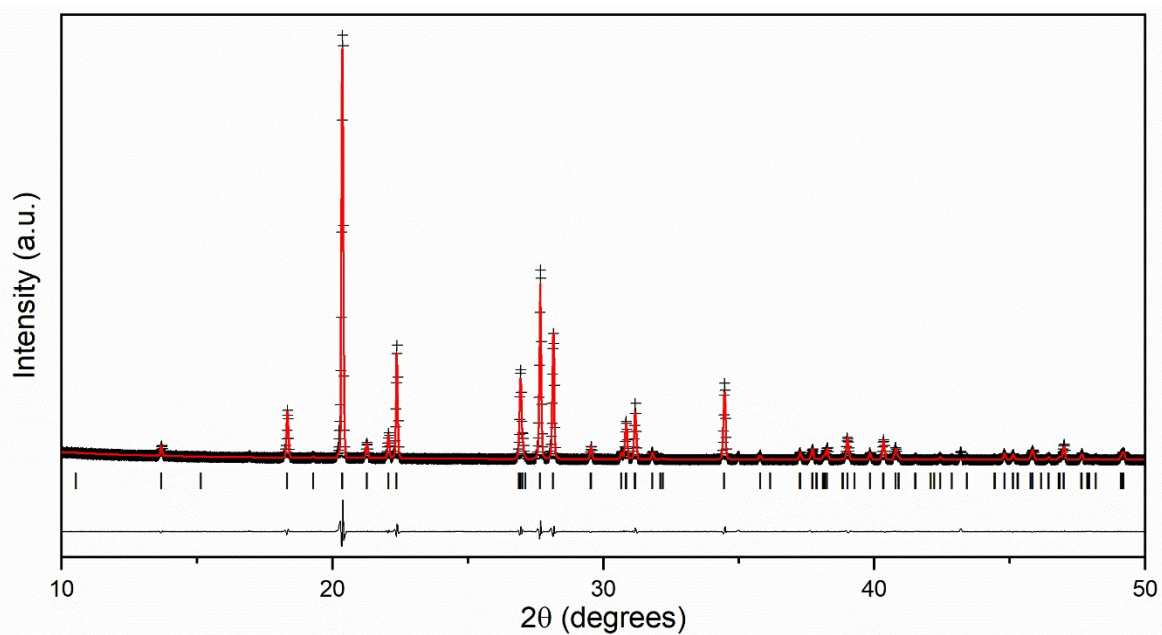

Figure S1. Observed (+), calculated (red) and difference (black) patterns of the Rietveld analysis of the XRD data collected from  $\text{Li}_4\text{P}_2\text{O}_7$ -800. The structural model in reference 9 was adopted. Space group  $P\bar{1}$ ;  $a=8.5642(3)$ ,  $b=7.1061(3)$ ,  $c=5.1847(2)$ ,  $\alpha=111.400(3)^\circ$ ,  $\beta=89.987(3)^\circ$ , and  $\gamma=103.050(2)^\circ$ .

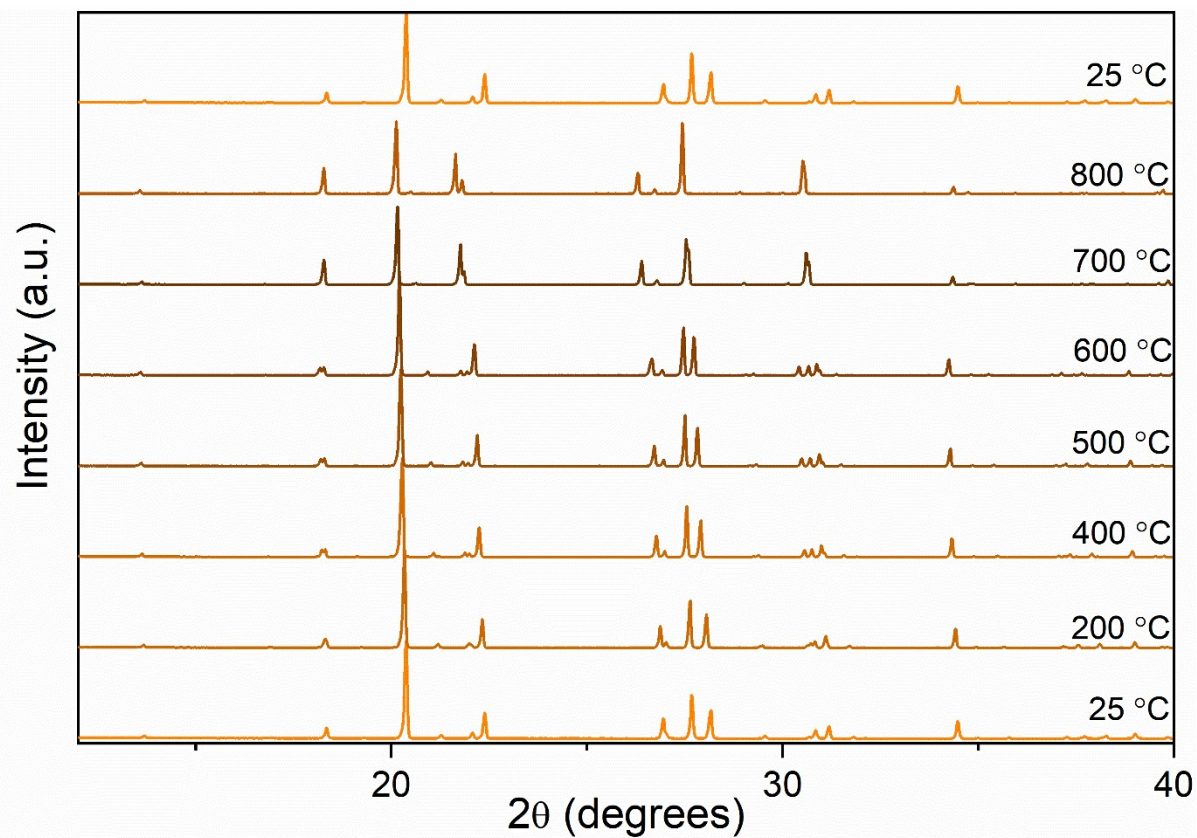

Figure S2. In situ XRD patterns of  $\text{Li}_4\text{P}_2\text{O}_7$ -800 (previously heated to 800°C) through heating from room temperature to 800°C, then cooling back to room temperature. This is the second heating/cooling cycle of  $\text{Li}_4\text{P}_2\text{O}_7$ -400; the first heating/cooling cycle is shown in Figure 2.

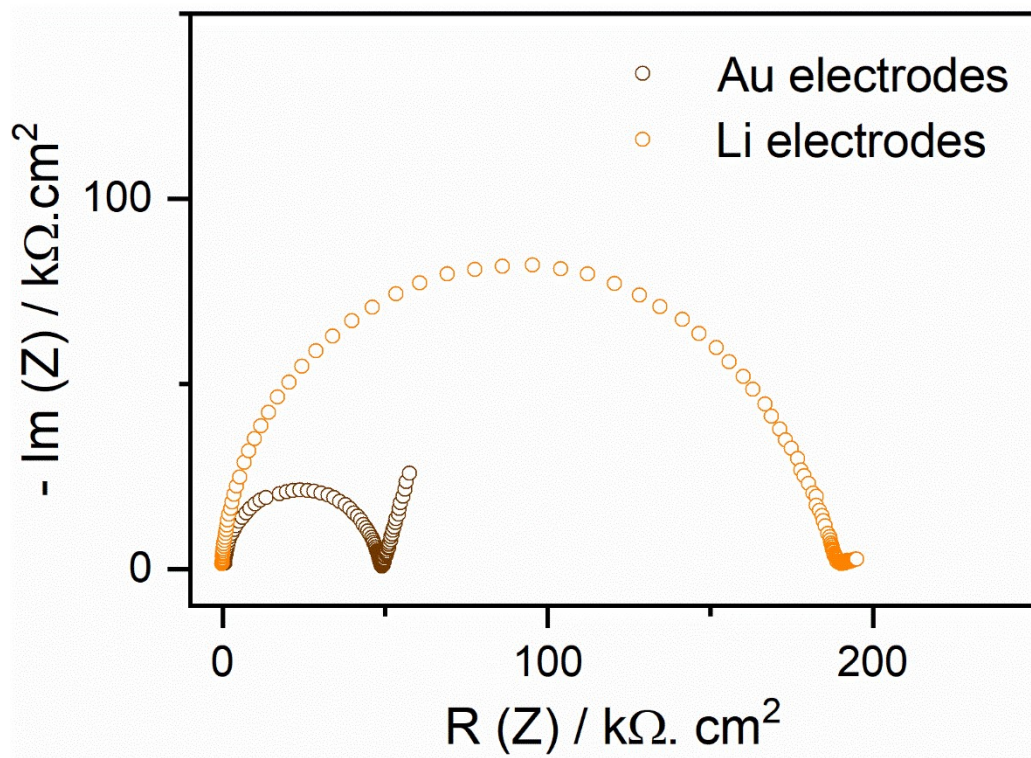

Figure S3. Impedance collected from  $\text{Li}_4\text{P}_2\text{O}_7$ -400 using Au and Li electrodes (at  $80^\circ\text{C}$ ).
